# Supplementary material for: Regulation of cysteine homeostasis and its effect on Escherichia coli sensitivity to ciprofloxacin in LB medium
Source: Preprints.org preprint supplement (doi:10.20944/preprints202403.1876.v1), 2024-04-01
Supplement: Supplementary file 1 [file supplementary]

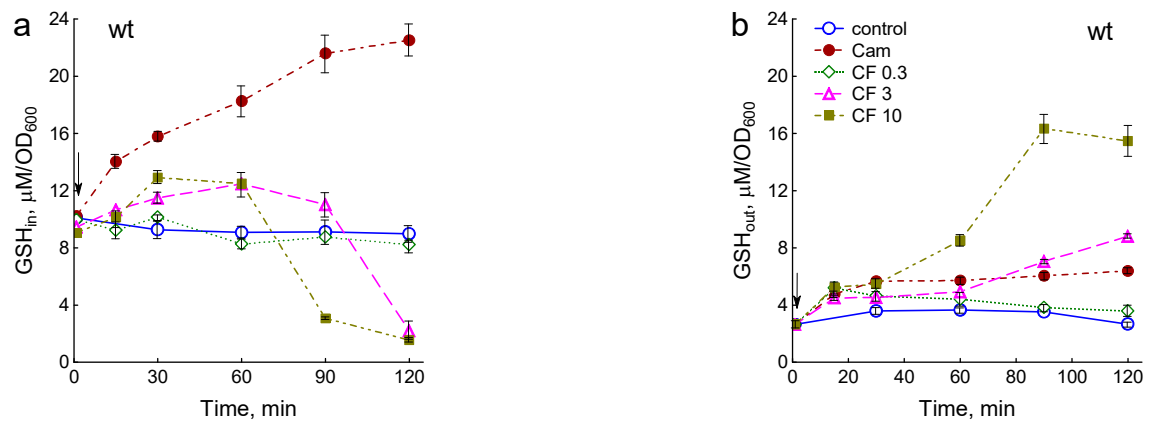

Fig. 2S. Changes in intracellular (GSH<sub>in</sub>) (a) and extracellular (GSH<sub>out</sub>) (b) glutathione when *E. coli* BW25113 (wt) was treated with chloramphenicol (Cam 25  $\mu\text{g}/\text{ml}$ ) or ciprofloxacin (CF 0.3 - 10  $\mu\text{g}/\text{ml}$ ).
