# Supplementary material for: Regulation of cysteine homeostasis and its effect on Escherichia coli sensitivity to ciprofloxacin in LB medium
Source: Preprints.org preprint supplement (doi:10.20944/preprints202403.1876.v1), 2024-04-01
Supplement: Supplementary file 3 [file supplementary]

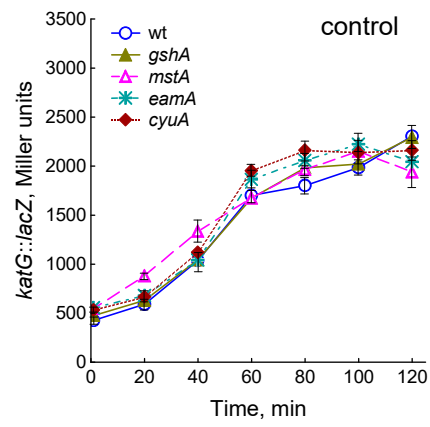

Fig. 3S. The expression of *katG::lacZ* in the *gshA*, *mstA*, *eamA*, and *cyuA* mutants does not differ significantly from the parental strain.
