# Supplementary material for: Regulation of cysteine homeostasis and its effect on Escherichia coli sensitivity to ciprofloxacin in LB medium
Source: Preprints.org preprint supplement (doi:10.20944/preprints202403.1876.v1), 2024-04-01
Supplement: Supplementary file 4 [file supplementary]

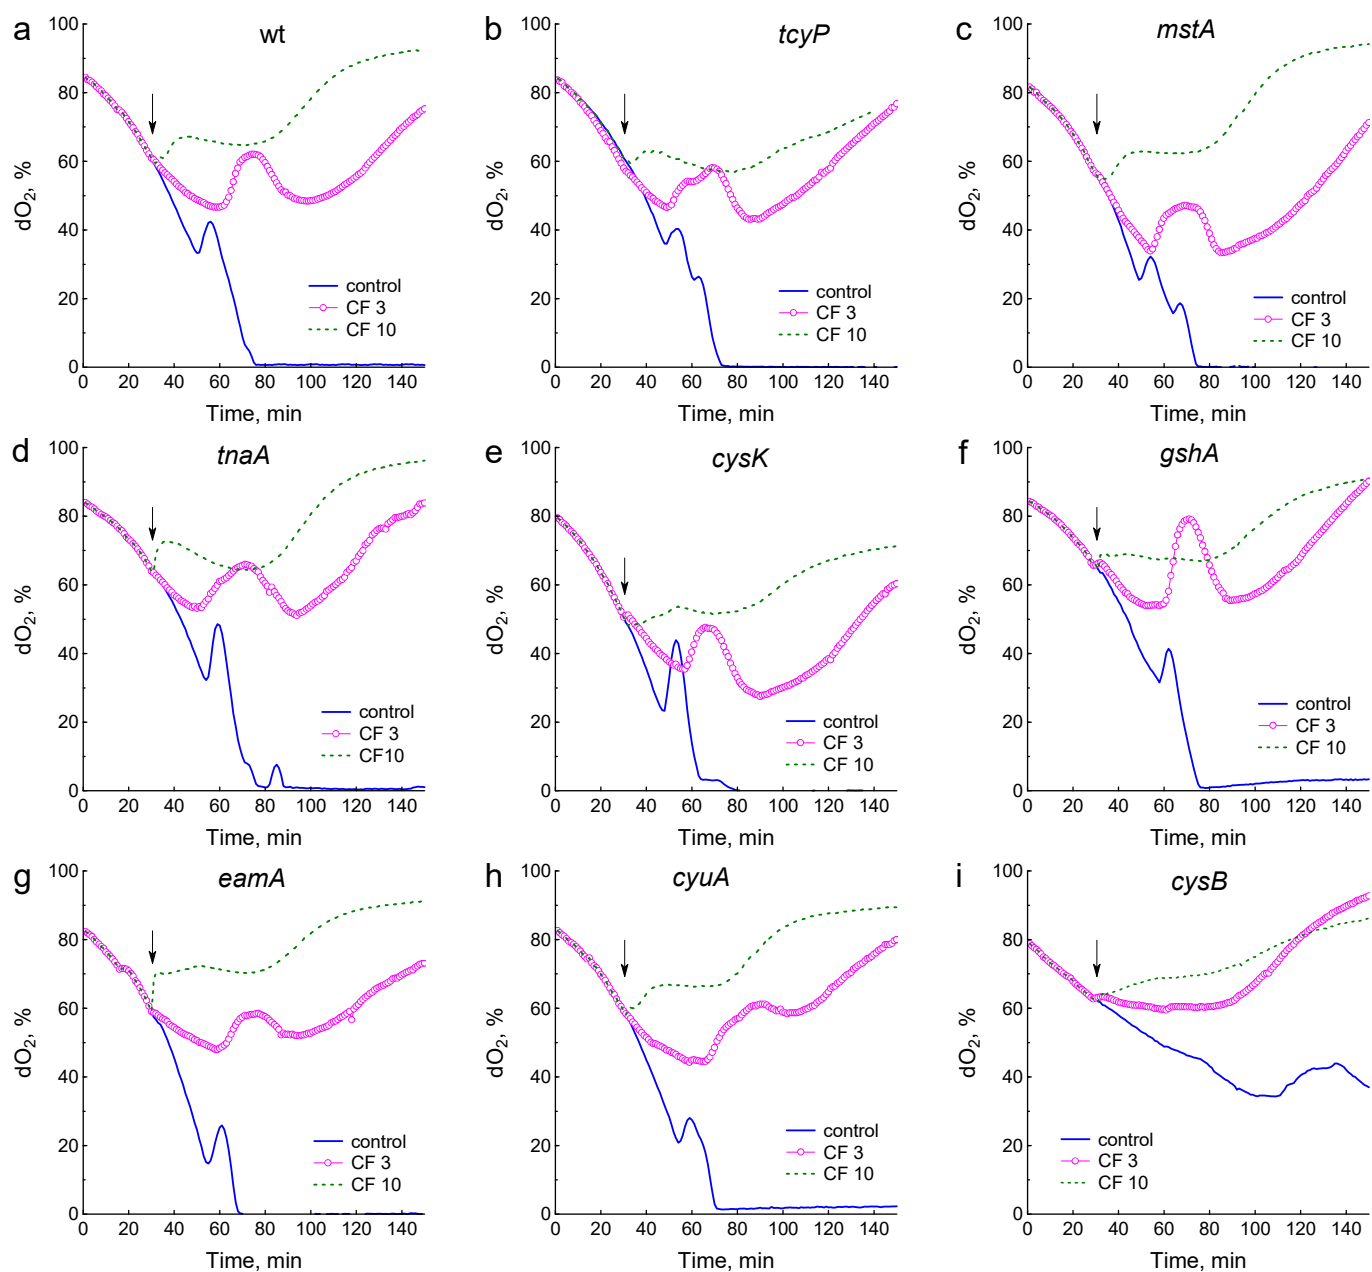

Fig. 5S. Effect of ciprofloxacin (3 and 10  $\mu\text{g/ml}$ ) on changes in the concentration of dissolved oxygen ( $dO_2$ ) in the culture medium of the studied *E. coli* strains. The time for adding ciprofloxacin is indicated by the arrow.
