# Supplementary material for: Regulation of cysteine homeostasis and its effect on Escherichia coli sensitivity to ciprofloxacin in LB medium
Source: Preprints.org preprint supplement (doi:10.20944/preprints202403.1876.v1), 2024-04-01
Supplement: Supplementary file 5 [file supplementary]

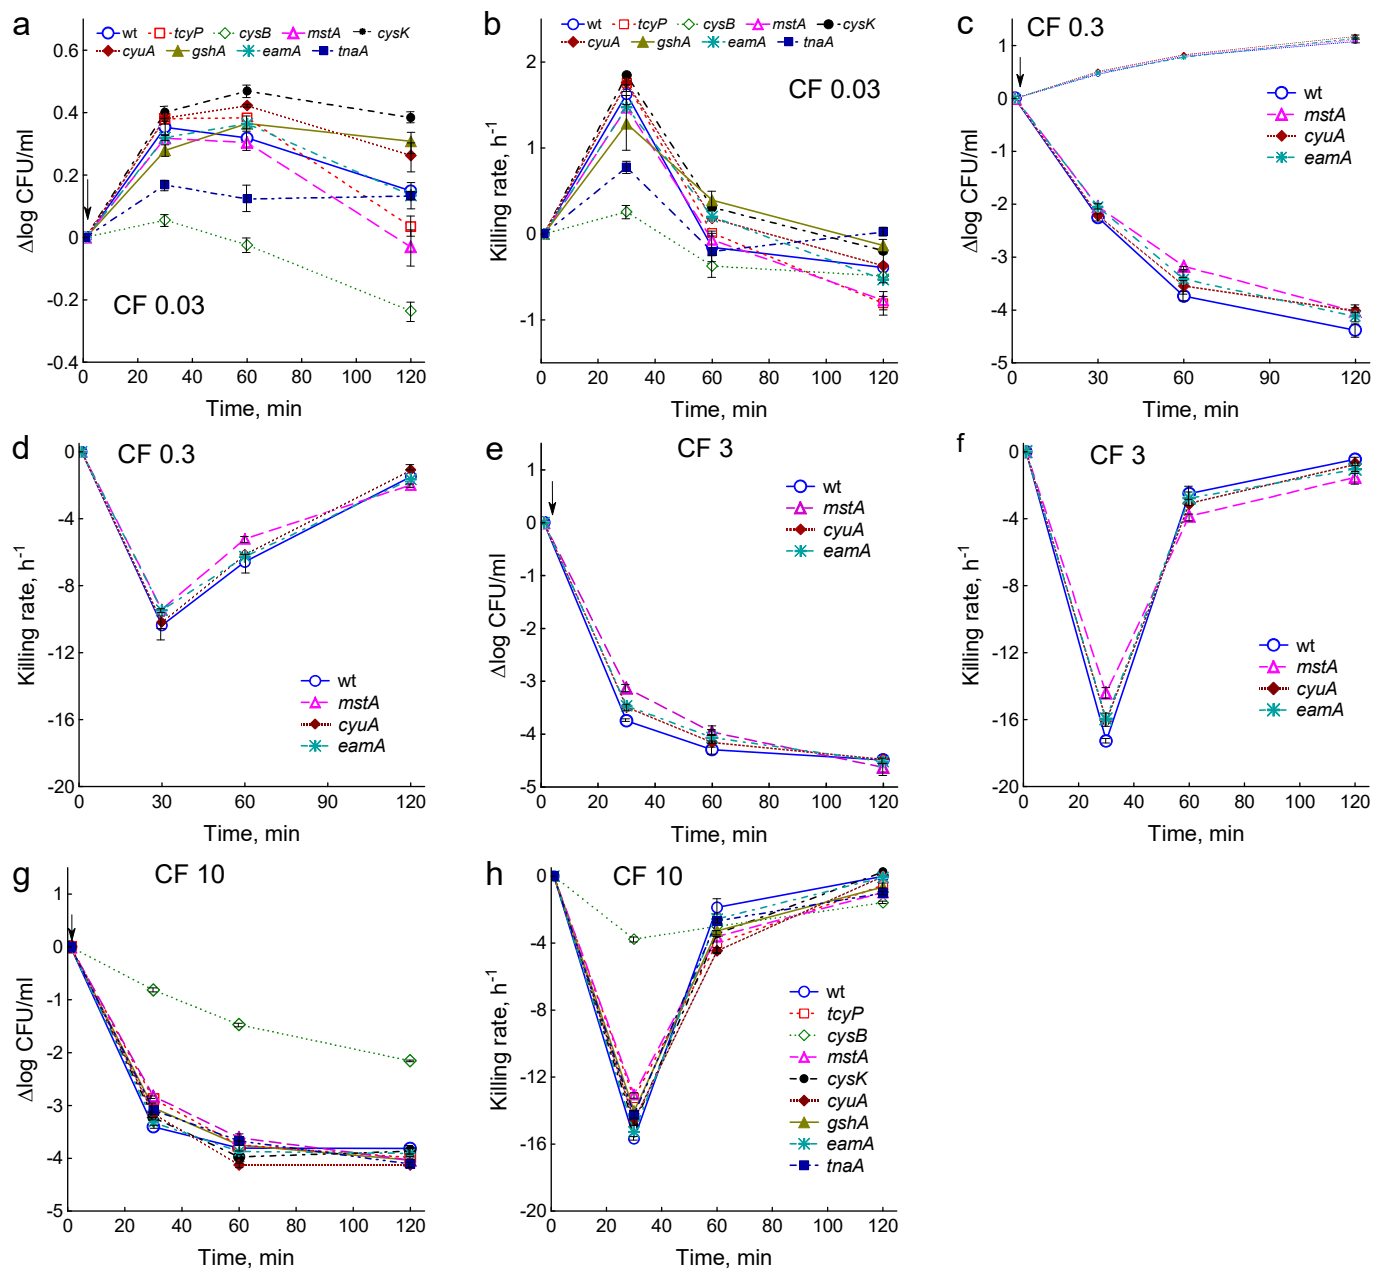

Fig. 7S. Killing curves (a, c, e, g) and killing rate (b, d, f, h) upon exposure of studied *E. coli* mutants to 0.03 (a, b), 0.3 (c, d), 3 (e, f) and 10 µg/ml (g, h) ciprofloxacin. The time for adding ciprofloxacin is indicated by the arrow. Values are the means and standard error (vertical bars) from at least three independent experiments.
