# Supplementary figures and images for: Regulation of cysteine homeostasis and its effect on Escherichia coli sensitivity to ciprofloxacin in LB medium
Source: Preprints.org preprint supplement (doi:10.20944/preprints202403.1876.v1), 2024-04-01

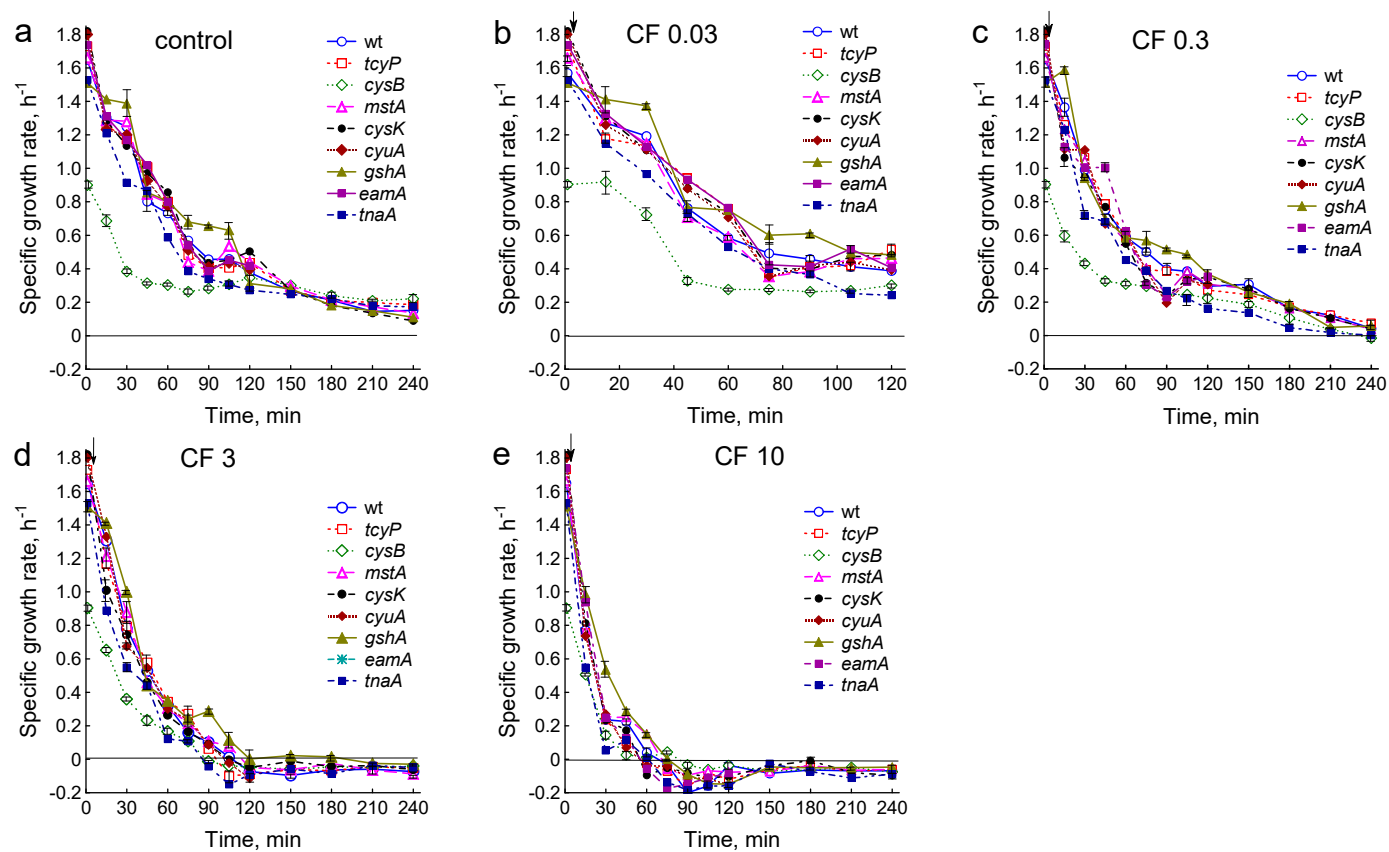

Fig. 4S. Effect of ciprofloxacin on the specific growth rate of the studied mutants.

Supplement: Supplementary file 6 [file supplementary]
